# Supplementary material for: COVID-19 and Adverse Pregnancy Outcome: A Systematic Review of 104 Cases
Source: PubMed Central journal article supplement (PMC7692613; doi:10.3390/jcm9113441), 2020-10-26
Supplement: jcm-09-03441-s001.pdf [file jcm-09-03441-s001.pdf]

*Supplementary Materials*

# **COVID-19 and Adverse Pregnancy Outcome: A Systematic Review of 104 Cases**

## **Table of contents**

|                                                                           |    |
|---------------------------------------------------------------------------|----|
| 1. PRISMA Checklist .....                                                 | 1  |
| 2. Search strategy .....                                                  | 3  |
| 3. Reasons for study exclusion.....                                       | 4  |
| 4. Detailed distribution of patients on the studies included studies..... | 5  |
| 5. References .....                                                       | 11 |

## 1. PRISMA Checklist

**Table S1.** Checklist summarizing compliance with PRISMA guidelines\*.

| Section/topic                      | #  | Checklist item                                                                                                                                                                                                                                                                                              | Reported on page # |
|------------------------------------|----|-------------------------------------------------------------------------------------------------------------------------------------------------------------------------------------------------------------------------------------------------------------------------------------------------------------|--------------------|
| <b>TITLE</b>                       |    |                                                                                                                                                                                                                                                                                                             |                    |
| Title                              | 1  | Identify the report as a systematic review, meta-analysis, or both.                                                                                                                                                                                                                                         | Title              |
| <b>ABSTRACT</b>                    |    |                                                                                                                                                                                                                                                                                                             |                    |
| Structured summary                 | 2  | Provide a structured summary including, as applicable: background; objectives; data sources; study eligibility criteria, participants, and interventions; study appraisal and synthesis methods; results; limitations; conclusions and implications of key findings; systematic review registration number. | 1                  |
| <b>INTRODUCTION</b>                |    |                                                                                                                                                                                                                                                                                                             |                    |
| Rationale                          | 3  | Describe the rationale for the review in the context of what is already known.                                                                                                                                                                                                                              | 2                  |
| Objectives                         | 4  | Provide an explicit statement of questions being addressed with reference to participants, interventions, comparisons, outcomes, and study design (PICOS).                                                                                                                                                  | 2                  |
| <b>METHODS</b>                     |    |                                                                                                                                                                                                                                                                                                             |                    |
| Protocol and registration          | 5  | Indicate if a review protocol exists, if and where it can be accessed (e.g., Web address), and, if available, provide registration information including registration number.                                                                                                                               | N/A                |
| Eligibility criteria               | 6  | Specify study characteristics (e.g., PICOS, length of follow-up) and report characteristics (e.g., years considered, language, publication status) used as criteria for eligibility, giving rationale.                                                                                                      | 3                  |
| Information sources                | 7  | Describe all information sources (e.g., databases with dates of coverage, contact with study authors to identify additional studies) in the search and date last searched.                                                                                                                                  | 3                  |
| Search                             | 8  | Present full electronic search strategy for at least one database, including any limits used, such that it could be repeated.                                                                                                                                                                               | 3                  |
| Study selection                    | 9  | State the process for selecting studies (i.e., screening, eligibility, included in systematic review, and, if applicable, included in the meta-analysis).                                                                                                                                                   | 3 (Figure1)        |
| Data collection process            | 10 | Describe method of data extraction from reports (e.g., piloted forms, independently, in duplicate) and any processes for obtaining and confirming data from investigators.                                                                                                                                  | 3                  |
| Data items                         | 11 | List and define all variables for which data were sought (e.g., PICOS, funding sources) and any assumptions and simplifications made.                                                                                                                                                                       | 3                  |
| Risk of bias in individual studies | 12 | Describe methods used for assessing risk of bias of individual studies (including specification of whether this was done at the study or outcome level), and how this information is to be used in any data synthesis.                                                                                      | N/A                |
| Summary measures                   | 13 | State the principal summary measures (e.g., risk ratio, difference in means).                                                                                                                                                                                                                               | 3                  |

|                               |    |                                                                                                                                                                                                          |                                    |
|-------------------------------|----|----------------------------------------------------------------------------------------------------------------------------------------------------------------------------------------------------------|------------------------------------|
| Synthesis of results          | 14 | Describe the methods of handling data and combining results of studies, if done, including measures of consistency (e.g., I <sup>2</sup> ) for each meta-analysis.                                       | 4                                  |
| Risk of bias across studies   | 15 | Specify any assessment of risk of bias that may affect the cumulative evidence (e.g., publication bias, selective reporting within studies).                                                             | N/A                                |
| Additional analyses           | 16 | Describe methods of additional analyses (e.g., sensitivity or subgroup analyses, meta-regression), if done, indicating which were pre-specified.                                                         | N/A                                |
| <b>RESULTS</b>                |    |                                                                                                                                                                                                          |                                    |
| Study selection               | 17 | Give numbers of studies screened, assessed for eligibility, and included in the review, with reasons for exclusions at each stage, ideally with a flow diagram.                                          | 4-9                                |
| Study characteristics         | 18 | For each study, present characteristics for which data were extracted (e.g., study size, PICOS, follow-up period) and provide the citations.                                                             | 4-9, Table 1, Supplementary tables |
| Risk of bias within studies   | 19 | Present data on risk of bias of each study and, if available, any outcome level assessment (see item 12).                                                                                                | Supplementary tables               |
| Results of individual studies | 20 | For all outcomes considered (benefits or harms), present, for each study: (a) simple summary data for each intervention group (b) effect estimates and confidence intervals, ideally with a forest plot. | 4-12, Supplementary tables         |
| Synthesis of results          | 21 | Present results of each meta-analysis done, including confidence intervals and measures of consistency.                                                                                                  | 4-12                               |
| Risk of bias across studies   | 22 | Present results of any assessment of risk of bias across studies (see Item 15).                                                                                                                          | N/A                                |
| Additional analysis           | 23 | Give results of additional analyses, if done (e.g., sensitivity or subgroup analyses, meta-regression [see Item 16]).                                                                                    | N/A                                |
| <b>DISCUSSION</b>             |    |                                                                                                                                                                                                          |                                    |
| Summary of evidence           | 24 | Summarize the main findings including the strength of evidence for each main outcome; consider their relevance to key groups (e.g., healthcare providers, users, and policy makers).                     | 12-13                              |
| Limitations                   | 25 | Discuss limitations at study and outcome level (e.g., risk of bias), and at review-level (e.g., incomplete retrieval of identified research, reporting bias).                                            | 13                                 |
| Conclusions                   | 26 | Provide a general interpretation of the results in the context of other evidence, and implications for future research.                                                                                  | 13                                 |
| <b>FUNDING</b>                |    |                                                                                                                                                                                                          |                                    |
| Funding                       | 27 | Describe sources of funding for the systematic review and other support (e.g., supply of data); role of funders for the systematic review.                                                               | 13                                 |

\*Moher D, Liberati A, Tetzlaff J, Altman DG; PRISMA Group (2009) Preferred reporting items for systematic reviews and meta-analyses: the PRISMA statement. J Clin Epidemiol 62:1006-1012.

## 2. Search strategy

We searched PubMed, MEDLINE, Scopus, Embase and Web of Science for reports published only in English until May 4, 2020, that assessed all informations of pregnant patients with COVID-19. We searched all fields for coronavirus (search terms: "Coronavirus 19", "COVID-19", "SARS-CoV-2", "2019-nCoV", "novel coronavirus 2019") and terms of pregnancy (search terms: "pregnan\*").

Full search strategies for each database are given in Table S2.

**Table S2.** Search strategy.

| Database       | Number of studies | Search terms                                                                                                                              |
|----------------|-------------------|-------------------------------------------------------------------------------------------------------------------------------------------|
| PubMed         | 172               | ("Coronavirus 19" OR "COVID-19" OR "SARS-CoV-2" OR "2019-nCoV" OR "novel coronavirus 2019")<br>AND<br>("pregnan*")                        |
| Medline        | 58                | ("Coronavirus 19" OR "COVID-19" OR "SARS-CoV-2" OR "2019-nCoV" OR "novel coronavirus 2019")<br>AND<br>("pregnan*")                        |
| Scopus         | 34                | TITLE-ABS-KEY("Coronavirus 19" OR "COVID-19" OR "SARS-CoV-2" OR "2019-nCoV" OR "novel coronavirus 2019")<br>AND TITLE-ABS-KEY("pregnan*") |
| Embase         | 45                | ('Coronavirus 19' OR 'COVID-19' OR 'SARS-CoV-2' OR '2019-nCoV' OR 'novel coronavirus 2019')<br>AND<br>('pregnan*')                        |
| Web of Science | 12                | ((TS=Coronavirus 19) OR (TS=COVID-19) OR (TS=SARS-CoV-2) OR (TS=2019-nCoV) OR (TS=novel coronavirus 2019))<br>AND<br>((TS=pregnan*))      |

### 3. Reasons for study exclusion

We manually screened the retrieved articles which were met inclusion criteria. After excluding studies by examining titles and abstracts, full texts of 11 case series articles were eligible for inclusion.

88 studies were retrieved following reasons:

**Table S3.** Reason for exclusion during full text screening.

| <b>Number of studies</b> | <b>Reason</b>                                                                                    |
|--------------------------|--------------------------------------------------------------------------------------------------|
| 27                       | Articles without case series                                                                     |
| 25                       | Focusing on treatment or management, not on prognosis.                                           |
| 18                       | Case reports                                                                                     |
| 7                        | Not accessible                                                                                   |
| 6                        | Focusing on prevention                                                                           |
| 5                        | Focusing on fetus (clinical data and characteristics of the mother were missing or not complete) |

#### 4. Detailed distribution of patients on the studies included studies

Table S4. Detailed description about basal characteristics of included case-series.

| Authors                               | Age | Gestation period (weeks) | Date of Diagnosis of COVID-19 | Country | Place of residence | Symptoms at hospitalization                     | Obstetrical complications | SARS-Cov-2 quantitative RT-PCR | Postpartum fever (°C) | Respiratory symptoms | CT images          | Treatment                              | Delivery method | Neonatal SARS-CoV-2 quantitative RT-PCR | Neonatal survival               | Maternal survival |
|---------------------------------------|-----|--------------------------|-------------------------------|---------|--------------------|-------------------------------------------------|---------------------------|--------------------------------|-----------------------|----------------------|--------------------|----------------------------------------|-----------------|-----------------------------------------|---------------------------------|-------------------|
| Siyu Chen et al. (2020) <sup>11</sup> | 29  | 40 <sup>-4</sup>         | 27/01/2020 14:30              | China   | Wuhan, Hubei       | None                                            | Gestational diabetes      | -                              | 38.5                  | -                    | GGO* in left lung  | Antibiotics                            | Natural birth   | -, Negative                             | Alive                           | Alive             |
|                                       | 30  | 39 <sup>-1</sup>         | 27/01/2020 09:50              | China   | Wuhan, Hubei       | None                                            | Preeclampsia              | +                              | 37.5                  | -                    | GGO in both lungs  | Antibiotics                            | C-section       | -, Negative                             | Alive                           | Alive             |
|                                       | 25  | 38 <sup>-6</sup>         | 25/01/2020 23:43              | China   | Wuhan, Hubei       | None                                            | None                      | +                              | 37.4                  | Cough                | GGO in right lung  | Antibiotics                            | Natural birth   | -, Negative                             | Alive                           | Alive             |
|                                       | 31  | 39 <sup>-6</sup>         | 28/01/2020 02:36              | China   | Wuhan, Hubei       | None                                            | None                      | +                              | 37.4                  | -                    | GGO in right lung  | Antibiotics                            | Natural birth   | -, Negative                             | Alive                           | Alive             |
|                                       | 29  | 39                       | 28/01/2020 08:31              | China   | Wuhan, Hubei       | None                                            | Gestational diabetes      | +                              | 37.8                  | Sputum, coryza       | GGO in both lungs  | Antibiotics                            | C-section       | -, Negative                             | Alive                           | Alive             |
| Liao J et al (2020) <sup>21</sup>     | 29  | 40 <sup>-4</sup>         | 20/01/2020~02/03/2020         | China   | Wuhan              | Sore throat                                     | -                         | Not done                       | -                     | Sore throat          | Multiple patch GGO | -                                      | Natural birth   | Not done                                | Alive                           | Alive             |
|                                       | 36  | 39                       | 20/01/2020~02/03/2020         | China   | Wuhan              | Cough                                           | -                         | Not done                       | -                     | Cough                | Multiple patch GGO | -                                      | Natural birth   | Not done                                | Alive                           | Alive             |
|                                       | 30  | 39 <sup>-5</sup>         | 20/01/2020~02/03/2020         | China   | Wuhan              | Fever                                           | -                         | Not done                       | -                     | -                    | Multiple patch GGO | -                                      | Natural birth   | Not done                                | Alive                           | Alive             |
|                                       | 36  | 37 <sup>-6</sup>         | 20/01/2020~02/03/2020         | China   | Wuhan              | -                                               | -                         | Not done                       | -                     | -                    | Multiple patch GGO | -                                      | Natural birth   | -, Negative                             | Alive                           | Alive             |
|                                       | 36  | 38 <sup>-1</sup>         | 20/01/2020~02/03/2020         | China   | Wuhan              | Fever                                           | -                         | Not done                       | -                     | -                    | Multiple patch GGO | -                                      | Natural birth   | -, Negative                             | Alive                           | Alive             |
|                                       | 30  | 40 <sup>-1</sup>         | 20/01/2020~02/03/2020         | China   | Wuhan              | Cough                                           | -                         | Not done                       | -                     | Cough                | Multiple patch GGO | -                                      | Natural birth   | -, Negative                             | Alive                           | Alive             |
|                                       | 33  | 39 <sup>-4</sup>         | 20/01/2020~02/03/2020         | China   | Wuhan              | Cough                                           | -                         | Not done                       | -                     | Cough                | Multiple patch GGO | -                                      | Natural birth   | -, Negative                             | Alive                           | Alive             |
|                                       | 33  | 36 <sup>-2</sup>         | 20/01/2020~02/03/2020         | China   | Wuhan              | Fever                                           | -                         | Not done                       | -                     | -                    | Multiple patch GGO | -                                      | Natural birth   | -, Negative                             | Alive                           | Alive             |
|                                       | 27  | 40 <sup>-2</sup>         | 20/01/2020~02/03/2020         | China   | Wuhan              | Fever, Chest pain                               | -                         | Not done                       | -                     | -                    | Multiple patch GGO | -                                      | Natural birth   | -, Negative                             | Alive                           | Alive             |
|                                       | 29  | 37 <sup>-2</sup>         | 20/01/2020~02/03/2020         | China   | Wuhan              | Fever                                           | -                         | Not done                       | -                     | -                    | Multiple patch GGO | -                                      | Natural birth   | -, Negative                             | Alive, Hyaline membrane disease | Alive             |
| Luming Xu et al (2020) <sup>29</sup>  | 34  | 38 <sup>-6</sup>         | 21/01/2020~09/02/2020         | China   | Wuhan              | Fever, Chest distress, Abdominal pain, anorexia | -                         | +                              | 37.6                  | Chest distress       | GGO in both lungs  | Antibiotics, Antiviral                 | C-section       | -, Negative                             | Alive                           | -                 |
|                                       | 25  | 34 <sup>-4</sup>         | 21/01/2020~09/02/2020         | China   | Wuhan              | Fever                                           | -                         | +                              | -                     | -                    | GGO in both lungs  | Antibiotics, Antiviral, Corticosteroid | C-section       | -, Negative                             | Alive                           | -                 |

|                                              |    |                  |                       |       |             |                                                 |                                                   |   |           |                                      |                                                 |                                                                    |               |             |                       |       |
|----------------------------------------------|----|------------------|-----------------------|-------|-------------|-------------------------------------------------|---------------------------------------------------|---|-----------|--------------------------------------|-------------------------------------------------|--------------------------------------------------------------------|---------------|-------------|-----------------------|-------|
|                                              | 23 | 37 <sup>-3</sup> | 21/01/2020~09/02/2020 | China | Wuhan       | Fever,Chest distress ,Cough<br>Dyspnea          | -                                                 | + | 38.7      | Chest distress,<br>Cough,<br>Dyspnea | GGO in both lungs                               | Antibiotics<br>Antiviral                                           | C-section     | -, Negative | Alive                 | -     |
|                                              | 34 | 36 <sup>-4</sup> | 21/01/2020~09/02/2020 | China | Wuhan       | Fever                                           | -                                                 | + | -         | -                                    | GGO in both lungs                               | Antibiotics<br>Antiviral,<br>Corticosteroid                        | C-section     | -, Negative | Alive                 | -     |
|                                              | 28 | 37               | 21/01/2020~09/02/2020 | China | Wuhan       | Fever ,Cough<br>,<br>Dyspnea,<br>Abdominal pain | -                                                 | + | 39.3      | Cough                                | GGO in both lungs                               | Antibiotics<br>Antiviral<br>Corticosteroid                         | Natural birth | -, Negative | Alive                 | -     |
| <b>Buonsenso D et al (2020)<sup>40</sup></b> | 31 | 24               | -                     | Italy | -           | Fever,<br>Cough,<br>Shortness of breath         | -                                                 | + | -         | Cough,<br>Shortness of breath        | -                                               | hydroxychloroquine<br>lopinavir/ritonavir<br>tocilizumab#,<br>CPAP | -             | Not done    | Alive<br>In pregnancy | Alive |
|                                              | 42 | 38               | -                     | Italy | -           | Fever, Cough                                    | -                                                 | + | -         | Cough                                | -                                               | hydroxychloroquine<br>lopinavir/ritonavir                          | C-section     | -, Negative | Alive                 | Alive |
|                                              | 39 | 17               | -                     | Italy | -           | Cough,<br>Ageusia,<br>Anosmia                   | -                                                 | + | -         | -                                    | -                                               | hydroxychloroquine<br>lopinavir/ritonavir                          | -             | Not done    | Alive<br>In pregnancy | Alive |
|                                              | 38 | 38               | -                     | Italy | -           | Fever,Cough                                     | -                                                 | + | -         | Cough                                | -                                               | hydroxychloroquine<br>lopinavir/ritonavir                          | C-section     | -, Negative | Alive                 | Alive |
| <b>Dongmei CAO Et al (2020)<sup>41</sup></b> | 31 | 34 <sup>-6</sup> | -                     | China | Wuhan Hubei | Fever                                           | Placental Abruption,<br>Preeclampsia<br>Premature | + | 37.3-38.0 | -                                    | +, bilateral (abnl), Strip,<br>pleural effusion | -                                                                  | C-section     | -, Negative | Alive<br>premature    | Alive |
|                                              | 29 | 40 <sup>-3</sup> | -                     | China | Wuhan Hubei | -                                               | PROM, Fetal distress                              | + | -         | -                                    | +, single, GGO                                  | -                                                                  | C-section     | Not done    | Alive                 | Alive |
|                                              | 30 | 38 <sup>-1</sup> | -                     | China | Wuhan Hubei | -                                               | -                                                 | + | -         | -                                    | +, single, Patch                                | -                                                                  | Natural birth | Not done    | Alive                 | Alive |
|                                              | 35 | 33 <sup>-6</sup> | -                     | China | Wuhan Hubei | Fever                                           | Premature,<br>PROM                                | + | 37.3-38.0 | -                                    | +, bilateral, patch,<br>Pleural thickening      | -                                                                  | C-section     | -, Negative | Alive                 | Alive |
|                                              | 29 | 40 <sup>-0</sup> | -                     | China | Wuhan Hubei | Fever                                           | Fetal distress                                    | + | 38.1-39.0 | -                                    | +, bilateral,patch,<br>Pleural effusion         | -                                                                  | C-section     | -, Negative | Alive                 | Alive |
|                                              | 31 | 38 <sup>-3</sup> | -                     | China | Wuhan Hubei | Fever                                           | PROM,<br>Preeclampsia                             | + | 38.1-39.0 | -                                    | +, bilateral,patch,<br>pleural effusion         | -                                                                  | C-section     | Not done    | Alive                 | Alive |
|                                              | 30 | 35 <sup>-0</sup> | -                     | China | Wuhan Hubei | -                                               | Premature,<br>PROM, twin                          | + | -         | -                                    | +,single, strip,<br>GGO                         | -                                                                  | C-section     | -, Negative | Alive                 | Alive |

|                                             |    |                  |                  |       |             |                                        |                         |             |           |                        |                                            |             |               |             |       |       |
|---------------------------------------------|----|------------------|------------------|-------|-------------|----------------------------------------|-------------------------|-------------|-----------|------------------------|--------------------------------------------|-------------|---------------|-------------|-------|-------|
|                                             | 29 | 39 <sup>-2</sup> | -                | China | Wuhan Hubei | Fever                                  | Hypothyroidism , Anemia | +           | >39.1     | -                      | +, bilateral, pleural effusion             | -           | C-section     | Not done    | Alive | Alive |
|                                             | 30 | 39 <sup>-1</sup> | -                | China | Wuhan Hubei | Fever                                  | Preeclampsia            | +           | 37.3-38.0 | -                      | +, bilateral, patch, GGO, pleural effusion | -           | C-section     | Not done    | Alive | Alive |
|                                             | 29 | 40 <sup>-6</sup> | -                | China | Wuhan Hubei | Fever, Cough, Chest tightness, Fatigue | GDM                     | +           | 38.1-39.0 | Cough, Chest tightness | +, single, patch, GGO                      | -           | Natural birth | Not done    | Alive | Alive |
| <b>Chunchen Wu Et al(2020)<sup>6)</sup></b> | 28 | 39               | -                | China | Wuhan Hubei | Fever                                  | -                       | +           | -         | -                      | -                                          | antibiotics | C-section     | No result   | -     | -     |
|                                             | 31 | 38 <sup>-1</sup> | -                | China | Wuhan Hubei | Fever                                  | PROM                    | +           | -         | -                      | -                                          | Antibiotics | C-section     | No result   | -     | -     |
|                                             | 30 | 39 <sup>-1</sup> | -                | China | Wuhan Hubei | -                                      | Preeclampsia            | +           | -         | -                      | GGO, small plaque                          | Antibiotics | C-section     | No result   | -     | -     |
|                                             | 30 | 36 <sup>-4</sup> | -                | China | Wuhan Hubei | -                                      | PROM                    | +           | -         | -                      | GGO, small plaque                          | Antibiotics | C-section     | No result   | -     | -     |
|                                             | 30 | 37 <sup>-6</sup> | -                | China | Wuhan Hubei | -                                      | -                       | +           | -         | -                      | GGO, small plaque                          | Antibiotics | Natural birth | No result   | -     | -     |
|                                             | 26 | 40 <sup>-3</sup> | -                | China | Wuhan Hubei | -                                      | Fetal distress          | +           | -         | -                      | GGO, small plaque                          | Antibiotics | C-section     | No result   | -     | -     |
|                                             | 29 | 40 <sup>-4</sup> | -                | China | Wuhan Hubei | Fever                                  | -                       | Not done    | -         | -                      | GGO, small plaque                          | Antibiotics | Natural Birth | No result   | -     | -     |
| <b>Pu Yang Et al (2020)<sup>7)</sup></b>    | 35 | 33 <sup>-6</sup> | -                | China | Wuhan Hubei | Fever                                  | -                       | Not done    | -         | -                      | GGO, small plaque                          | antibiotics | C-section     | No result   | -     | -     |
|                                             | -  | 37 <sup>-2</sup> | 33 <sup>-6</sup> | China | Wuhan       | Fever                                  | -                       | +           | -         | -                      | +, viral pneumonia                         | -           | C-section     | -,Negative  | Alive | -     |
|                                             | -  | 38 <sup>-2</sup> | 23/01/2020       | China | Wuhan       | Fever                                  | -                       | +           | -         | -                      | +                                          | -           | C-section     | -,Negative  | Alive | -     |
|                                             | -  | 36 <sup>-2</sup> | 27/01/2020       | China | Wuhan       | Fever, diarrhea                        | -                       | +           | -         | -                      | +                                          | -           | C-section     | -,Negative  | Alive | -     |
|                                             | -  | 36 <sup>-3</sup> | 28/01/2020       | China | Wuhan       | Cough                                  | -                       | +           | -         | Cough                  | +                                          | -           | C-section     | -,Negative  | Alive | -     |
|                                             | -  | 36               | 29/01/2020       | China | Wuhan       | Abdominal pain                         | -                       | +           | -         | -                      | +                                          | -           | C-section     | -,Negative  | Alive | -     |
|                                             | -  | 36 <sup>-2</sup> | 29/01/2020       | China | Wuhan       | Fever                                  | -                       | +           | -         | -                      | Normal                                     | -           | C-section     | No result   | Alive | -     |
|                                             | -  | 38               | 27/01/2020       | China | Wuhan       | Fever                                  | -                       | +           | -         | -                      | +                                          | -           | C-section     | -,Negative  | Alive | -     |
| <b>Xiaoqing Et al (2020)<sup>8)</sup></b>   | 27 | 39               | -                | China | Wuhan       | -                                      | -                       | -, negative | -         | -                      | -                                          | -           | -             | Not done    | -     | -     |
|                                             | 29 | 37 <sup>-6</sup> | -                | China | Wuhan       | Fever, Cough                           | -                       | +           | -         | Cough                  | Multiple patchy, wedge shaped GGO          | -           | -             | Not done    | -     | -     |
|                                             | 28 | 39 <sup>-1</sup> | -                | China | Wuhan       | -                                      | Threatened abortion     | -, negative | -         | -                      | -                                          | -           | -             | -, negative | -     | -     |



|                                         |    |                  |   |       |             |                   |                                                                 |   |             |                   |                                        |   |   |             |             |   |   |
|-----------------------------------------|----|------------------|---|-------|-------------|-------------------|-----------------------------------------------------------------|---|-------------|-------------------|----------------------------------------|---|---|-------------|-------------|---|---|
|                                         | 26 | 38 <sup>-5</sup> | - | China | Wuhan       | Nasal obstruction | -                                                               | + | -           | Nasal obstruction | -                                      | - | - | Not done    | -           | - |   |
|                                         | 33 | 38 <sup>-6</sup> | - | China | Wuhan       | -                 | Threatened abortion                                             | - | -, negative | -                 | Focal GGO, Rt. lobe                    | - | - | Not done    | -           | - |   |
|                                         | 28 | 38 <sup>-5</sup> | - | China | Wuhan       | Cough             | -                                                               | + | -           | Cough             | Pathy consolidation<br>Fibrous stripes | - | - | Not done    | -           | - |   |
|                                         | 34 | 38 <sup>-3</sup> | - | China | Wuhan       | -                 | PROM                                                            | + | -           | -                 | -                                      | - | - | -, negative | -           | - |   |
|                                         | 28 | 39 <sup>-1</sup> | - | China | Wuhan       | -                 | -                                                               | + | -           | -                 | GGO, bilateral<br>In lower lobes       | - | - | Not done    | -           | - |   |
|                                         | 24 | 12               | - | China | Wuhan       | -                 | Threatened abortion<br>Pregnancy induced HTN                    | + | -           | -                 | -                                      | - | - | Not done    | -           | - |   |
|                                         | 32 | 38               | - | China | Wuhan       | Cough             | -                                                               | + | -           | Cough             | GGO, Rt lobe                           | - | - | Not done    | -           | - |   |
|                                         | 37 | 6                | - | China | Wuhan       | -                 | PROM<br>Pregnancy Induced HTN                                   | - | -, negative | -                 | -                                      | - | - | Not done    | -           | - |   |
|                                         | 22 | 8                | - | China | Wuhan       | Fever, Cough      | -                                                               | + | -           | Cough             | -                                      | - | - | Not done    | -           | - |   |
|                                         | 30 | 35 <sup>-4</sup> | - | China | Wuhan       | -                 | Pregnancy Induced HTN                                           | + | -           | -                 | GGO, Rt. lobe                          | - | - | Not done    | -           | - |   |
|                                         | 26 | 37 <sup>-3</sup> | - | China | Wuhan       | Fever, Cough      | -                                                               | + | -           | Cough             | -                                      | - | - | -, negative | -           | - |   |
|                                         | 29 | 39               | - | China | Wuhan       | -                 | -                                                               | + | -           | -                 | -                                      | - | - | Not done    | -           | - |   |
|                                         | 21 | 39 <sup>-9</sup> | - | China | Wuhan       | -                 | -                                                               | + | -           | -                 | -                                      | - | - | -, negative | -           | - |   |
|                                         | 26 | 38               | - | China | Wuhan       | -                 | -                                                               | + | -           | -                 | -                                      | - | - | Not done    | -           | - |   |
|                                         | 32 | 31 <sup>-5</sup> | - | China | Wuhan       | -                 | -                                                               | + | -           | -                 | -                                      | - | - | Not done    | -           | - |   |
|                                         | 35 | 37 <sup>-6</sup> | - | China | Wuhan       | Fever             | -                                                               | + | -           | -                 | -                                      | - | - | Not done    | -           | - |   |
|                                         | 30 | 40               | - | China | Wuhan       | -                 | Fetal intrauterine hypoxia                                      | + | -           | -                 | -                                      | - | - | Not done    | -           | - |   |
|                                         | 36 | 38 <sup>-1</sup> | - | China | Wuhan       | -                 | Pregnancy Induced HTN                                           | + | -           | -                 | -                                      | - | - | Not done    | -           | - |   |
|                                         | 30 | 31 <sup>-8</sup> | - | China | Wuhan       | -                 | -                                                               | + | -           | -                 | -                                      | - | - | Not done    | -           | - |   |
|                                         | 29 | 37 <sup>-2</sup> | - | China | Wuhan       | -                 | -                                                               | + | -           | -                 | -                                      | - | - | Not done    | -           | - |   |
| <b>Liao J et al (2020)<sup>99</sup></b> | 25 | -                | - | China | Wuhan Hubei | Fever             | Intrauterine fetal distress<br>Cord torsion<br>Oligohydramnions | + | -           | -                 | 개별 결과<br>Not reported                  | - | - | C-section   | -, negative | - | - |

|                                              |    |                  |       |             |                                     |                                                                               |              |      |                    |                                                     |   |               |              |       |       |
|----------------------------------------------|----|------------------|-------|-------------|-------------------------------------|-------------------------------------------------------------------------------|--------------|------|--------------------|-----------------------------------------------------|---|---------------|--------------|-------|-------|
| 35                                           | -  | -                | China | Wuhan Hubei | Fever                               | Scarred uterus PROM                                                           | +            | -    | -                  | Not reported                                        | - | C-section     | -, negative  | -     | -     |
| 35                                           | -  | -                | China | Wuhan Hubei | Cough                               | Intrauterine fetal distress PROM                                              | +            | -    | Cough              | Not reported                                        | - | Natural birth | -, negative  | -     | -     |
| 30                                           | -  | -                | China | Wuhan Hubei | Fever                               | Intrauterine fetal distress Vaginal bleeding In the 3 <sup>rd</sup> trimester | +            | -    | -                  | Not reported                                        | - | C-section     | -, negative  | -     | -     |
| 30                                           | -  | -                | China | Wuhan Hubei | Cholecystitis, Fever                | -                                                                             | +            | -    | -                  | Not reported                                        | - | C-section     | Not done     | -     | -     |
| 30                                           | -  | -                | China | Wuhan Hubei | Fever, Cough                        | Intrauterine fetal distress Cord-colloid Placenta previa Polyhydramnios       | +            | -    | Cough              | Not reported                                        | - | C-section     | -, negative  | -     | -     |
| 30                                           | -  | -                | China | Wuhan Hubei | Fever, Cough, sore Throat, diarrhea | Intrauterine fetal distress PROM                                              | +            | -    | Cough, Sore throat | Not reported                                        | - | C-section     | -, negative  | -     | -     |
| 29, twin(1)                                  | -  | -                | China | Wuhan Hubei | Fever, Cough                        | Intrauterine fetal distress                                                   | -, negative  | -    | Cough              | Bilateral GGO, patchy consolidation, blurred border | - | Natural birth | -, negative  | -     | -     |
| 29, Twin(2)                                  | -  | -                | China | Wuhan Hubei | Fever, Cough                        | Intrauterine fetal distress                                                   | -,negative   | -    | Cough              | Bilateral GGO, patchy consolidation, blurred border | - | Natural birth | -, negative  | -     | -     |
| 34                                           | -  | -                | China | Wuhan Hubei | Fever                               | -                                                                             | +            | -    | -                  | Not reported                                        | - | C-section     | -, negative  | -     | -     |
| <b>Yangli Liu et al (2020)<sup>100</sup></b> | 28 | 25               | -     | China       | Fever, Fatigue                      | -                                                                             | Not reported | -    | -                  | -                                                   | - | NA            | Not reported | Alive | Alive |
|                                              | 24 | 27               | -     | China       | Fever, Dyspnea                      | -                                                                             | Not reported | 38.5 | Dyspnea            | -                                                   | - | NA            | Not reported | Alive | Alive |
|                                              | 33 | 32               | -     | China       | Cough                               | Prematurity                                                                   | Not reported | -    | Cough              | -                                                   | - | C-section     | Not reported | Alive | Alive |
|                                              | 29 | 33               | -     | China       | Fever                               | -                                                                             | Not reported | 38   | -                  | -                                                   | - | NA            | Not reported | Alive | Alive |
|                                              | 35 | 34               | -     | China       | Fever                               | PROM, prematurity                                                             | Not reported | -    | -                  | -                                                   | - | C-section     | Not reported | Alive | Alive |
|                                              | 31 | 34               | -     | China       | Fever, sore throat                  | MODS Stillbirth Prematurity                                                   | Not reported | -    | Sore throat        | -                                                   | - | C-section     | Not reported | Death | Alive |
|                                              | 30 | 35               | -     | China       | Dyspnea                             | Fetal distress Prematurity                                                    | Not reported | -    | Dyspnea            | -                                                   | - | C-section     | Not reported | Alive | Alive |
|                                              | 36 | 35 <sup>45</sup> | -     | China       | Fever, cough, dyspnea               | Prematurity                                                                   | Not reported | -    | Cough, dyspnea     | -                                                   | - | C-section     | Not reported | Alive | Alive |
|                                              | 26 | 36               | -     | China       | Fever, fatigue                      | Prematurity                                                                   | Not          | -    | -                  | -                                                   | - | C-section     | Not reported | Alive | Alive |

|                                                        |       |                 |   |       |   |                                                                 |                      |                          |      |                                |                         |                                                              |                  |              |                                        |        |
|--------------------------------------------------------|-------|-----------------|---|-------|---|-----------------------------------------------------------------|----------------------|--------------------------|------|--------------------------------|-------------------------|--------------------------------------------------------------|------------------|--------------|----------------------------------------|--------|
|                                                        | 32    | 36 <sup>4</sup> | - | China | - | Fever, fatigue                                                  | Fetal distress       | reported<br>Not reported | 39   | -                              | -                       | -                                                            | C-section        | Not reported | Alive                                  | Alive  |
|                                                        | 30    | 37              | - | China | - | Fever, fatigue                                                  | Fetal distress       | Not reported             | -    | -                              | -                       | -                                                            | C-section        | Not reported | Alive                                  | Alive  |
|                                                        | 22    | 38              | - | China | - | -                                                               | -                    | Not reported             | -    | -                              | -                       | -                                                            | C-section        | Not reported | Alive                                  | Alive  |
|                                                        | 30    | 38 <sup>3</sup> | - | China | - | Fever                                                           | -                    | Not reported             | 37.3 | -                              | -                       | -                                                            | C-section        | Not reported | Alive                                  | Alive  |
| <b>Sedigheh Hantoushadeh et al (2020)<sup>10</sup></b> | 25-29 | 30 <sup>3</sup> | - | Iran  | - | Fever,Cough<br>Dyspnea,<br>Myalgia<br>Sore throat<br>Rhinorrhea | Fetal death          | +                        | -    | Cough<br>Dyspnea               | +                       | Antibiotics<br>Antiviral                                     | Natural<br>birth | Not done     | Death                                  | Death  |
|                                                        | 25-29 | 38 <sup>3</sup> | - | Iran  | - | Fever,Cough<br>Myalgia,<br>dyspnea                              | -                    | +                        | -    | Cough<br>Dyspnea               | Bilateral<br>patchy     | Antibiotics<br>Antiviral,<br>Anticoagulan<br>t               | C-section        | -, negative  | Alive                                  | Death  |
|                                                        | 40-44 | 30 <sup>5</sup> | - | Iran  | - | Fever,Cough<br>Dyspnea                                          | -                    | +                        | -    | Cough<br>Dyspnea               | Bilateral<br>Patchy GGO | Antibiotics<br>Antiviral,<br>Anticoagulan<br>t<br>HCQ        | C-section        | -, negative  | Alive                                  | Death  |
|                                                        | 30-34 | 24 <sup>7</sup> | - | Iran  | - | Fever,Cough<br>Dyspnea,<br>Myalgia                              | Fetal death          | +                        | -    | Cough<br>Dyspnea,              | Bilateral patch<br>GGO  | Antibiotics<br>Antiviral,<br>Anticoagulan<br>t<br>HCQ        | NA-              | Not done     | Death                                  | Death  |
|                                                        | 30-34 | 36              | - | Iran  | - | Fever,Cough<br>dyspnea                                          | -                    | +                        | -    | Cough<br>Dyspnea               | -                       | Antibiotics<br>Antiviral,<br>Anticoagulan<br>t               | C-section        | -, negative- | Alive                                  | Death  |
|                                                        | 35-39 | 24              | - | Iran  | - | Fever,Cough<br>Dyspnea,<br>Myalgia                              | Fetal death          | +                        | -    | Cough<br>Dyspnea               | Bilateral<br>patchy GGO | Antibiotics<br>Antiviral,<br>Anticoagulan<br>t<br>HCQ,IVIG   | NA               | Not done     | Death<br>(twin<br>DCDA)                | Death  |
|                                                        | 45-49 | 28              | - | Iran  | - | Fever,Cough<br>Dyspnea                                          | -                    | +                        | -    | Cough<br>Dyspnea               | Bilateral<br>patchy GGO | Antibiotics<br>Antiviral,<br>Anticoagulan<br>t<br>HCQ        | C-section        | -, negative  | Death after<br>birth<br>(twin<br>DCDA) | Death  |
|                                                        | 35-39 | 33 <sup>5</sup> | - | Iran  | - | Fever,Cough<br>Dyspnea,<br>Hemoptysis                           | -                    | +                        | -    | Cough<br>Dyspnea<br>hemoptysis | Bilateral<br>patchy GGO | Antibiotics<br>Antiviral,<br>Anticoagulan<br>t<br>HcQ,Plasma | C-section        | -, negative  | Alive                                  | Alive- |
|                                                        | 35-39 | 36              | - | Iran  | - | Fever,Cough<br>Dyspnea                                          | Fetal death<br>PPROM | +                        | -    | Cough<br>Dyspnea               | Bilateral<br>PatchyGGO  | Antibiotics<br>Antiviral,<br>Anticoagulan<br>t               | C-section        | Not done     | Death                                  | Alive- |

GGO : ground glass opacity; DCDA; dichorionic, diamniotic twin gestation, COVID; coronavirus disease 2019, HCQ; hydroxychloroquine, PPRM; preterm premature rupture of membrane, PROM; premature rupture of membrane, HTN; hypertension, NA; not available, C-section; caesarean section, Rt; right.

## 5. Reference

1. Chen S, Liao E, Cao D, Gao Y, Sun G, Shao Y. Clinical analysis of pregnant women with 2019 novel coronavirus pneumonia. *J Med Virol* 2020;
2. Liao J, He X, Gong Q, Yang L, Zhou C, Li J. Analysis of vaginal delivery outcomes among pregnant women in Wuhan, China during the COVID-19 pandemic. *Int J Gynaecol Obstet* 2020;
3. Xu L, Yang Q, Shi H, Lei S, Liu X, Zhu Y, et al. Clinical presentations and outcomes of SARS-CoV-2 infected pneumonia in pregnant women and health status of their neonates. *Sci Bull (Beijing)* 2020;
4. Buonsenso D, Raffaelli F, Tamburrini E, Biasucci DG, Salvi S, Smargiassi A, et al. Clinical role of lung ultrasound for the diagnosis and monitoring of COVID-19 pneumonia in pregnant women. *Ultrasound Obstet Gynecol* 2020;
5. Cao D, Yin H, Chen J, Tang F, Peng M, Li R, et al. Clinical analysis of ten pregnant women with COVID-19 in Wuhan, China: A retrospective study. *Int J Infect Dis* 2020;
6. Wu C, Yang W, Wu X, Zhang T, Zhao Y, Ren W, et al. Clinical Manifestation and Laboratory Characteristics of SARS-CoV-2 Infection in Pregnant Women. *Virol Sin* 2020;
7. Yang P, Wang X, Liu P, Wei C, He B, Zheng J, et al. Clinical characteristics and risk assessment of newborns born to mothers with COVID-19. *J Clin Virol* 2020;127:104356.
8. Wu X, Sun R, Chen J, Xie Y, Zhang S, Wang X. Radiological findings and clinical characteristics of pregnant women with COVID-19 pneumonia. *Int J Gynaecol Obstet* 2020;
9. Zhu H, Wang L, Fang C, Peng S, Zhang L, Chang G, et al. Clinical analysis of 10 neonates born to mothers with 2019-nCoV pneumonia. *Transl Pediatr* 2020;9:51-60.
10. Liu Y, Chen H, Tang K, Guo Y. Clinical manifestations and outcome of SARS-CoV-2 infection during pregnancy. *J Infect* 2020;
11. Hantoushzadeh S, Shamshirsaz AA, Aleyasin A, Seferovic MD, Aski SK, Arian SE, et al. Maternal Death Due to COVID-19 Disease. *Am J Obstet Gynecol* 2020;
